# Supplementary material for: TDP-43 promotes tau accumulation and selective neurotoxicity in bigenic Caenorhabditis elegans
Source: Oxford University Press journal article supplement (doi:10.1242/dmm.049323), 2022-02-18
Supplement: dmm049323supp.pdf [file dmm049323supp.pdf]

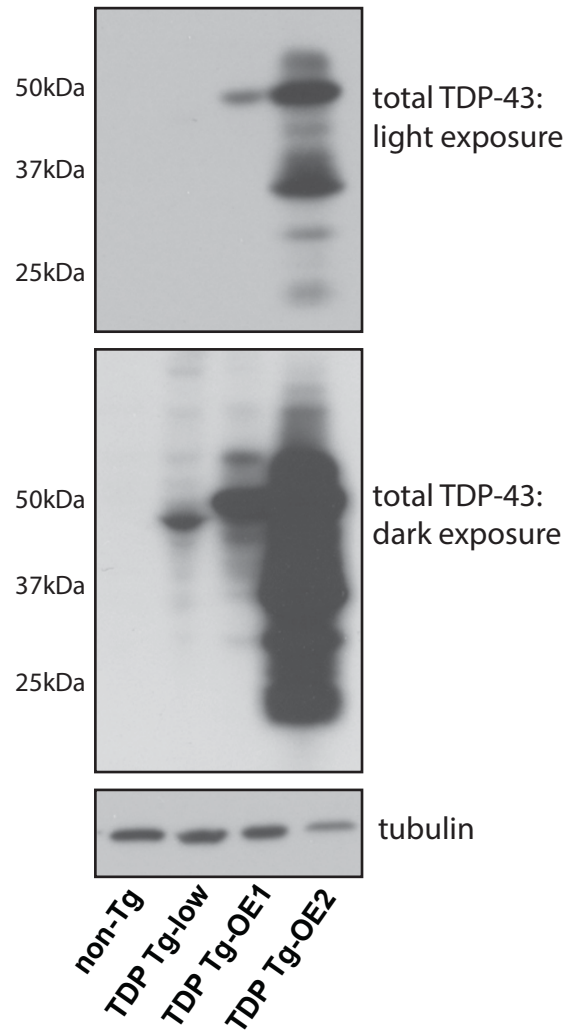

**Fig. S1. TDP Tg-low animals express low levels of TDP-43.** Immunoblot comparing TDP-43 protein levels among non-transgenic (non-Tg), TDP Tg-low, a TDP-43 transgenic line with moderate overexpression (TDP Tg-OE1), and a TDP-43 transgenic line with high levels of overexpression (TDP Tg-OE2). The TDP-43 sequence in each strain was verified by sequencing to code for full-length wild-type TDP-43. The slightly lower molecular weight of TDP Tg-low may be due to a lack of post-translational modifications, particularly phosphorylated TDP-43, which are present in the higher copy TDP-43 strains.

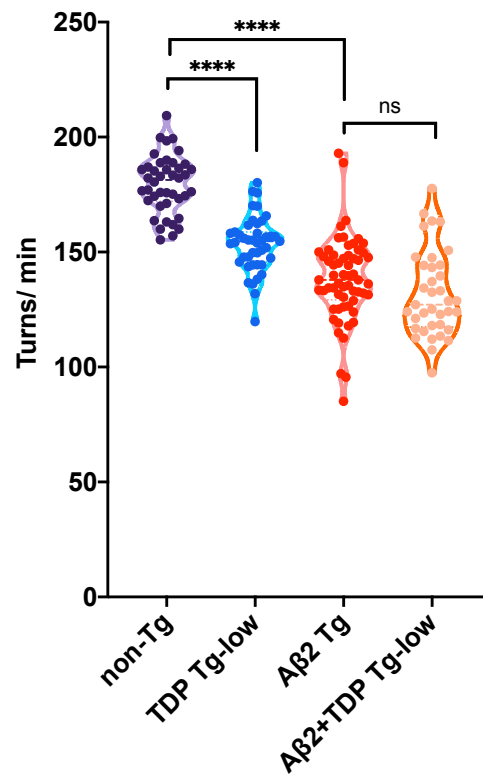

**Fig. S2. tau+TDP Tg-low animals do not synergize with Aβ.** Rates of thrashing in liquid were measured using unbiased computer-assisted tracking and analysis. The number of turns (thrashes) per second were recorded (turns/ sec). ns=not significant, \*\*\*\* $p < 0.0001$ . N=128 (non-TG), 202 (TDP Tg-low), 140 (Aβ Tg), 97 (Aβ+TDP Tg-low), from 3 independent replicates. \*\*\*\* $p < 0.0001$ , ns=not significant.

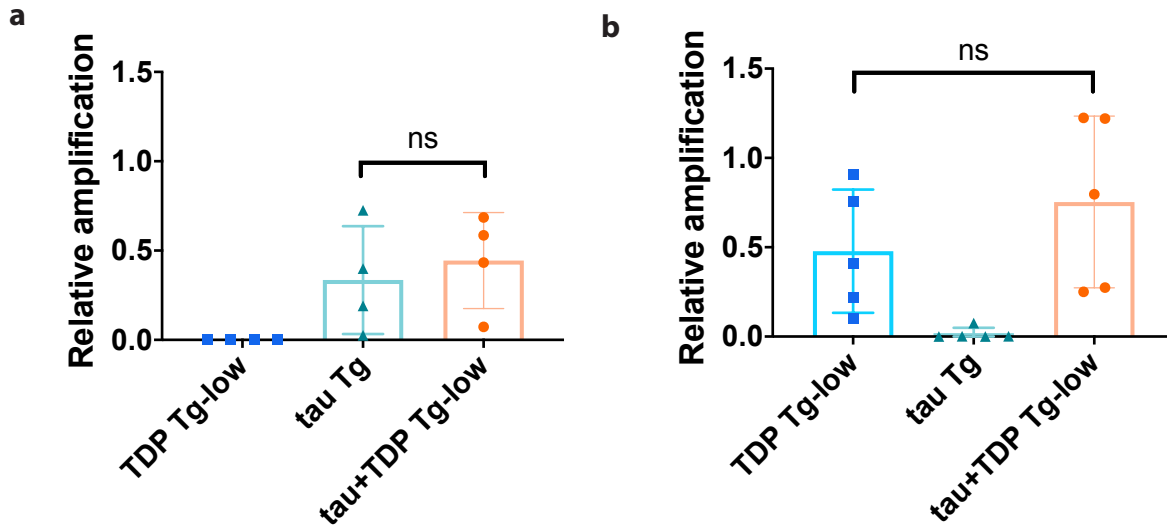

**Fig. S3. mRNA expression of tau and TDP-43 transgenes are unchanged in tau +TDP-43 Tg-low.** **a** Quantitative reverse-transcription PCR (qRT-PCR) testing expression of the tau transgene. tau signal is normalized to expression of an internal control gene, *rpl-32*, and plotted as arbitrary units. **b** qRT-PCR testing expression of the TDP-43 transgene. TDP-43 signal is normalized to expression of an internal control gene, *rpl-32*, and plotted as arbitrary units. ns=not significant.

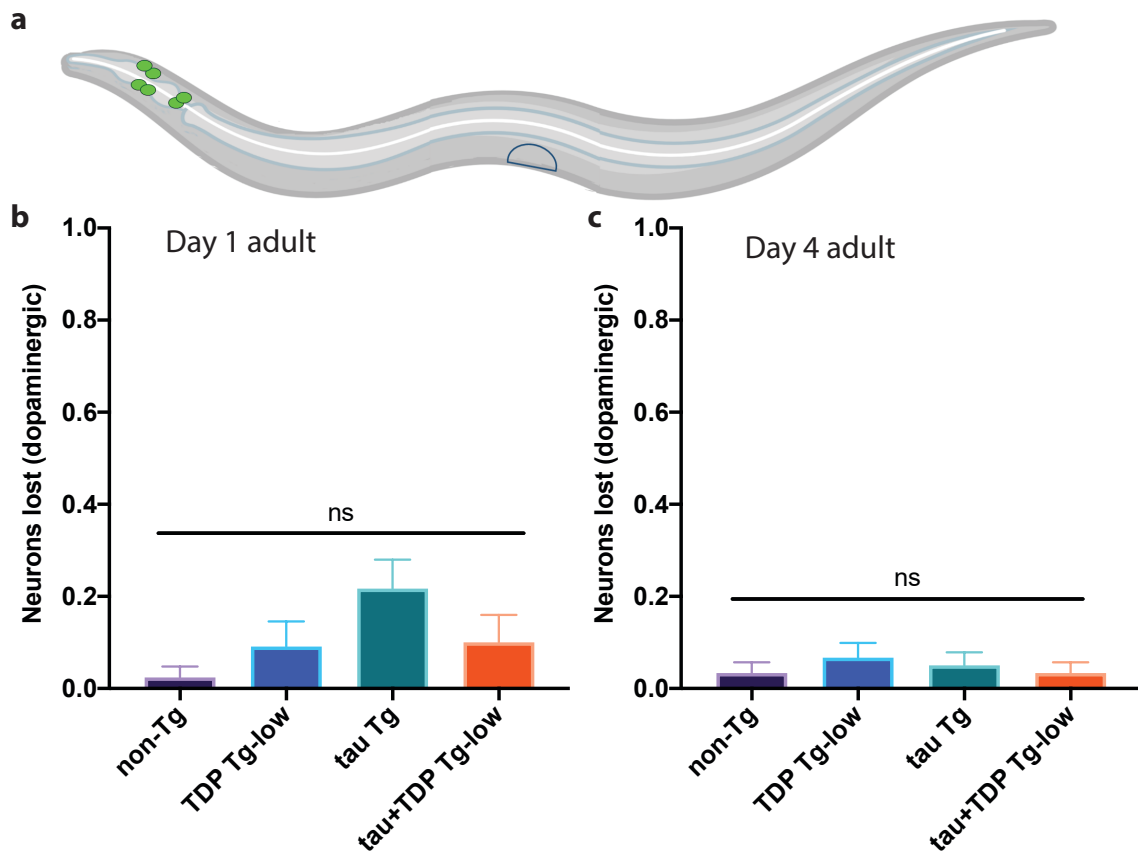

**Fig. S4. Co-expression of tau and TDP-43 does not impact dopaminergic neurons.** **a-c** Assessment of dopaminergic neurons in tau+TDP Tg-low animals. **a** Depiction of neurons scored (green). **b** Quantification of neurons lost in developmentally synchronized day 1 adult (**b**) and day 4 adult (**c**) *C. elegans*. ns = not significant. N>45 for all strains and timepoints scored, from at least 3 independent replicates.

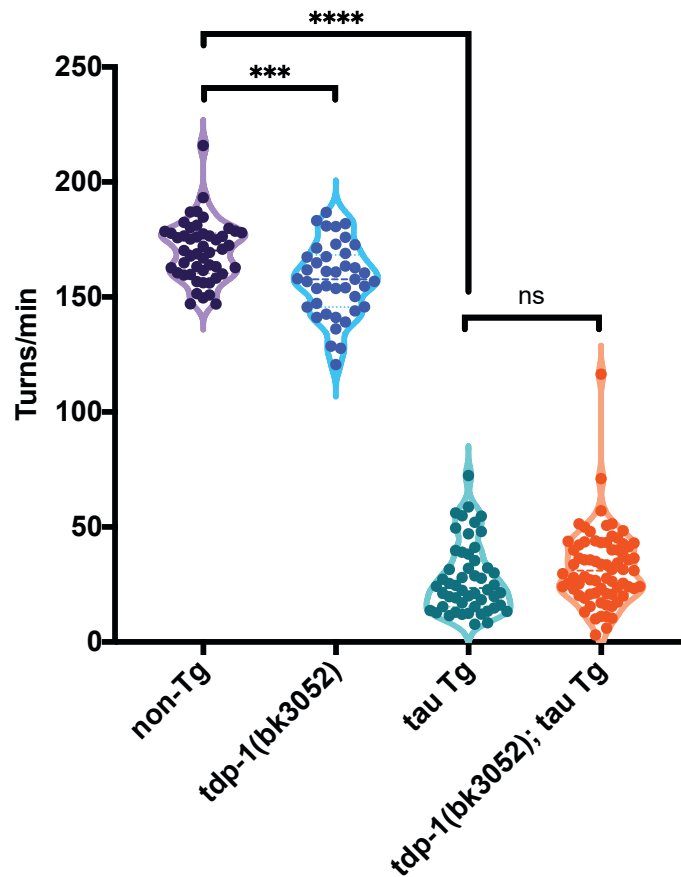

**Fig. S5. Loss of the *C. elegans* homolog of TDP-43, *tdp-1*, does not alter tau-driven motility dysfunction.** Rates of thrashing were measured using unbiased computer-assisted tracking and analysis. The number of turns (thrashes) per minute were recorded (turns/ min). ns=not significant, \*\*\* $P < 0.001$ , \*\*\*\* $p < 0.0001$ . N=49 (non-TG), 41 (*tdp-1(bk3052)*), 52 (tau Tg), 73 (*tdp-1(bk3052); tau Tg*), from 3 independent replicates.

**Table S1. Strains used in this study.**

| Abbreviation                    | Strain name | Genotype                                                                                                                                   | Transgene                |
|---------------------------------|-------------|--------------------------------------------------------------------------------------------------------------------------------------------|--------------------------|
| non-Tg                          | N2          | wild-type                                                                                                                                  |                          |
| tau Tg                          | CK1441      | <i>bkIs1441[Paex-3::Tau WT(4R1N)+Pmyo-2::dsRED]</i>                                                                                        | human tau                |
| A $\beta$ Tg                    | GRU102      | <i>gnals2[Pmyo-2::YFP+Punc-119::Abeta1-42]</i>                                                                                             | human A $\beta$          |
| A $\beta$ Tg 2                  | CL2355      | <i>dvIs50[pCL45(snb-1::Abeta1-42::3'UTR(long) + mlt-2::GFP]</i>                                                                            | human A $\beta$          |
| polyQ Tg                        | CK241       | <i>bkIs241[pF25B5.3::Q86-YFP]</i>                                                                                                          | 86 repeats of glutamine  |
| TDP Tg-low                      | CK1943      | <i>[Psnb-1::hTDP-43 WT::K4aptazyme::unc-54 3'UTR+Pmyo-3::mCherry]</i>                                                                      | human TDP-43             |
| tau+TDP Tg-low                  | NLS19       | <i>bkIs1441[Paex-3::Tau WT(4R1N)+Pmyo-2::dsRED]; bkIs1943[Psnb-1::hTDP-43 WT::K4aptazyme::unc-54 3'UTR+Pmyo-3::mCherry]</i>                | human tau and TDP-43     |
| <i>sut-2(-); tau+TDP Tg-low</i> | NLS23       | <i>sut-2(bk3011); bkIs1441[Paex-3::Tau WT(4R1N)+Pmyo-2::dsRED]; bkIs1943[Psnb-1::hTDP-43 WT::K4aptazyme::unc-54 3'UTR+Pmyo-3::mCherry]</i> | human tau and TDP-43     |
| <i>sut-2(-); TDP Tg-low</i>     | NLS24       | <i>sut-2(bk3011); bkIs1943[Psnb-1::hTDP-43 WT::K4aptazyme::unc-54 3'UTR+Pmyo-3::mCherry]</i>                                               | human TDP-43             |
| <i>sut-2(-); tau Tg</i>         | NLS25       | <i>sut-2(bk3011); bkIs1441[Paex-3::Tau WT(4R1N)+Pmyo-2::dsRED]</i>                                                                         | human tau                |
|                                 | EG1285      | <i>oxIs12[Punc-47::GFP + lin-15(+)]</i>                                                                                                    | GABAergic neuron GFP     |
|                                 | JPS617      | <i>Ptph-1::GFP</i>                                                                                                                         | serotonergic neuron GFP  |
|                                 | WG1         | <i>Pdat-1::GFP</i>                                                                                                                         | dopaminergic neuron GFP  |
|                                 | OH10972     | <i>Peat-4::GFP</i>                                                                                                                         | glutamatergic neuron GFP |
|                                 | LX929       | <i>Punc-17::GFP</i>                                                                                                                        | cholinergic neuron GFP   |
|                                 | CK3052      | <i>tdp-1(bk3052)</i>                                                                                                                       |                          |

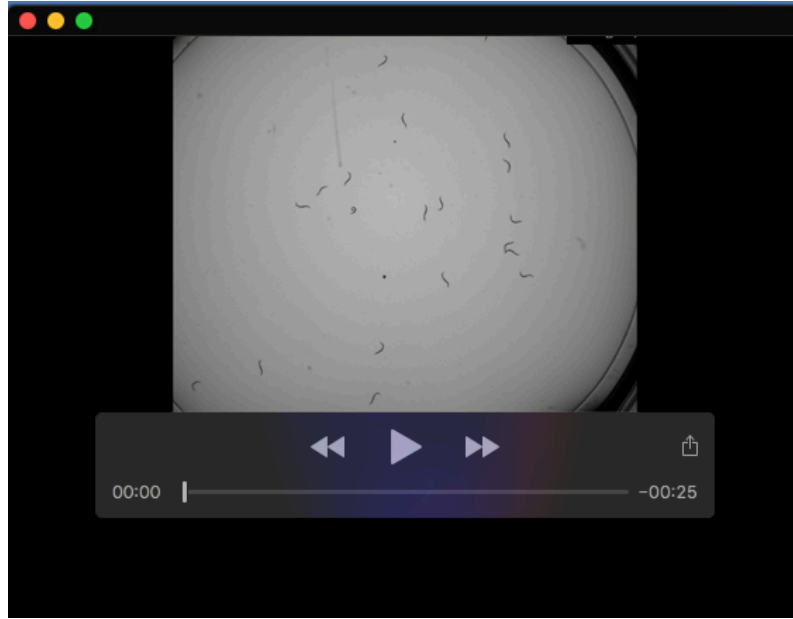

**Movie 1. Non-Tg animals have normal swimming in liquid.**

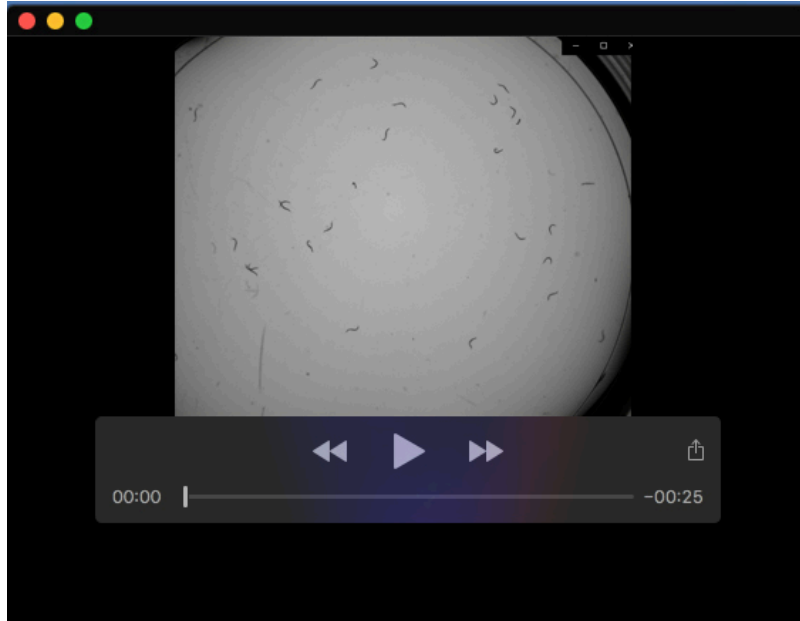

**Movie 2. TDP Tg-low animals have decreased rates of swimming in liquid.**

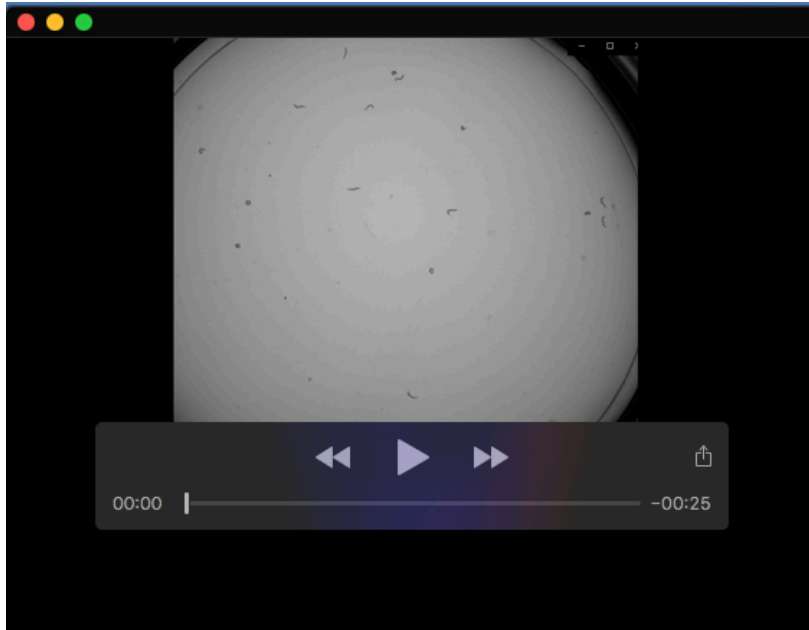

**Movie 3. tau Tg animals have significantly impaired swimming in liquid.**

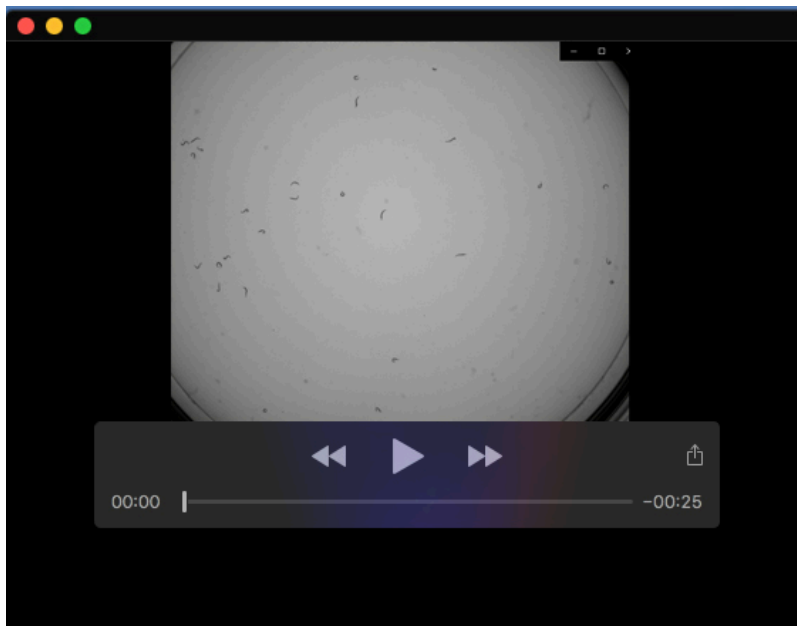

**Movie 4. tau+TDP Tg-low animals are unable to swim in liquid.**



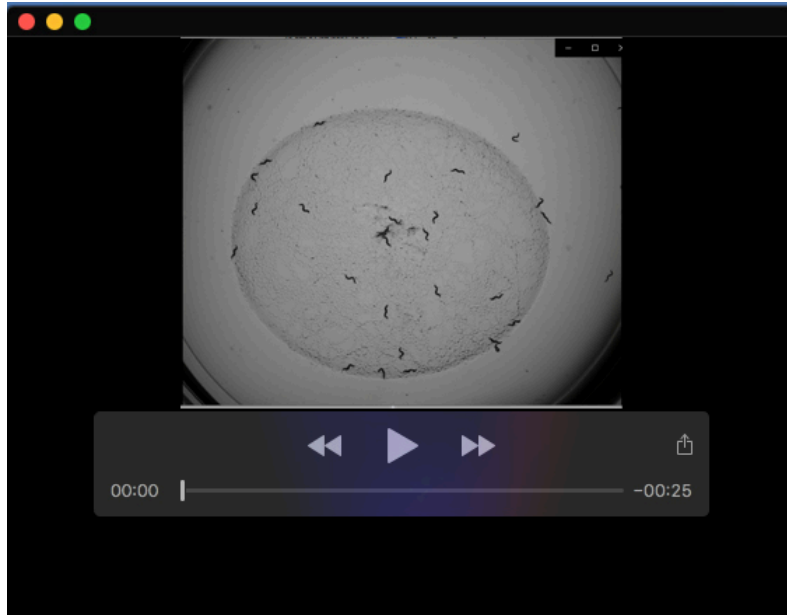

**Movie 5. Non-Tg animals have normal motility on a solid surface.**

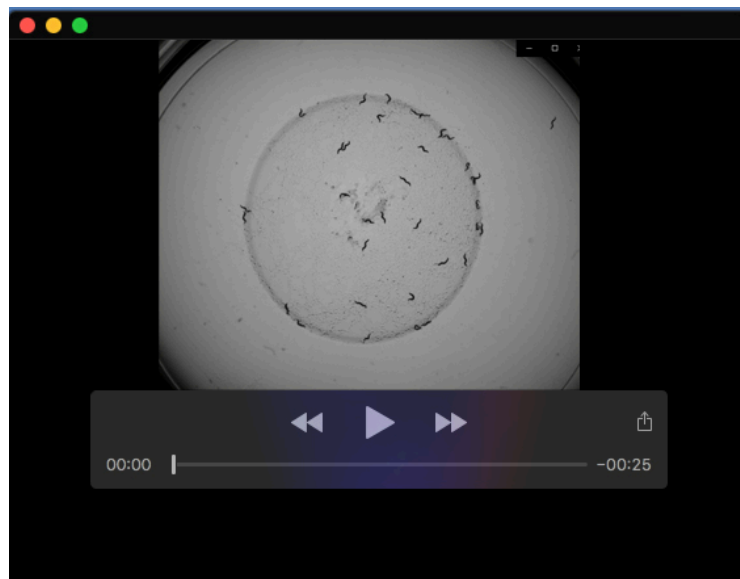

**Movie 6. TDP Tg-low animals have slower motility on a solid surface.**

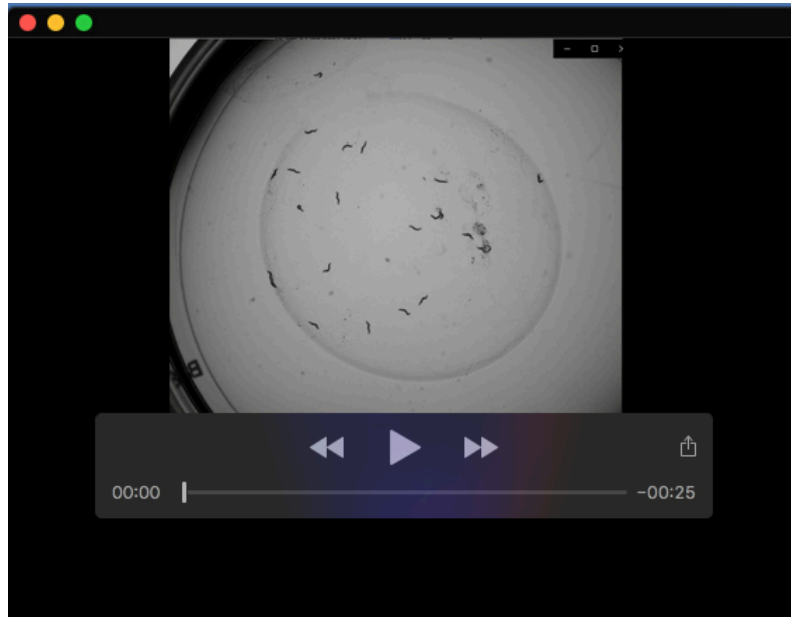

**Movie 7. tau Tg animals have impaired motility on a solid surface.**

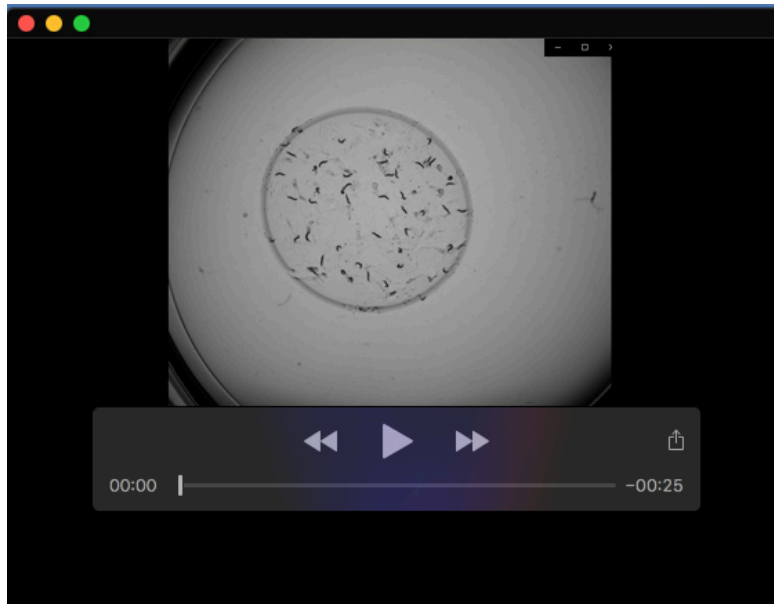

**Movie 8. tau+TDP Tg-low animals have significantly impaired motility on a solid surface.**
